# Supplementary material for: Few-layer large Ti3C2Tx sheets exfoliated by NaHF2 and applied to the sodium-ion battery
Source: Royal Society of Chemistry journal article supplement (doi:10.1039/d0ta12231a), 2021-01-01
Supplement: d0ta12231a1.pdf [file d0ta12231a1.pdf]

## Supporting Information

# Few-layer Large $\text{Ti}_3\text{C}_2\text{T}_x$ Sheets Exfoliated by $\text{NaHF}_2$ and Applied to Sodium-Ion Battery

Yan Zhao <sup>a</sup>, Meng Zhang <sup>a</sup>, Hong Yan <sup>\*a,b</sup>, Yu Feng <sup>a</sup>, Xinyu Zhang <sup>c</sup>, Ruijie Guo <sup>a,b</sup>

<sup>a</sup> College of Materials Science and Engineering, Taiyuan University of Technology, Taiyuan 030024, PR China

<sup>b</sup> Key Laboratory of Interface Science and Engineering in Advanced Materials (Taiyuan University of Technology), Ministry of Education, Taiyuan 030024, PR China

<sup>c</sup> Department of Chemical Engineering, Auburn University, Auburn 36849, U.S.A.

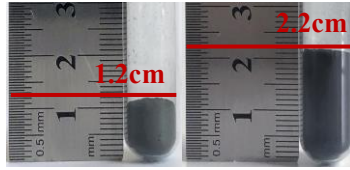

Figure S1. Optical images of  $\text{Ti}_3\text{AlC}_2$  and  $\text{Na-Ti}_3\text{C}_2\text{T}_x$  powder: (a)  $\text{Ti}_3\text{AlC}_2$  powder; (b) multilayered  $\text{Ti}_3\text{C}_2\text{T}_x$  powder etched by  $\text{NaHF}_2$ .

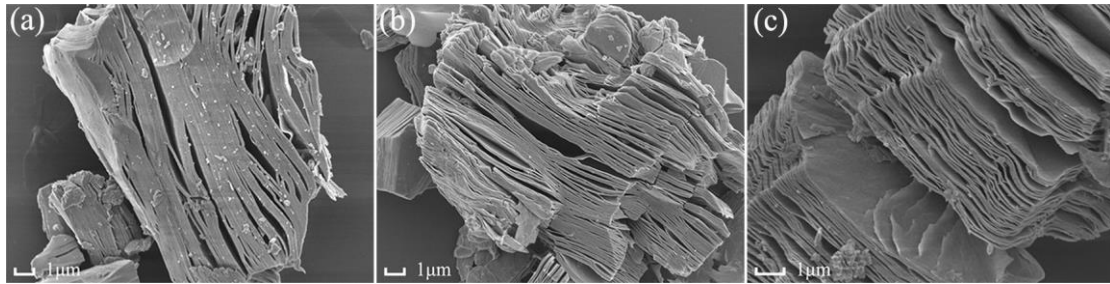

Figure S2. SEM images of  $\text{Ti}_3\text{C}_2\text{T}_x$  etched in: (a)  $\text{NH}_4\text{HF}_2$  solution; (b)  $\text{HF}$  solution; and (c)  $\text{NaHF}_2$  solution.

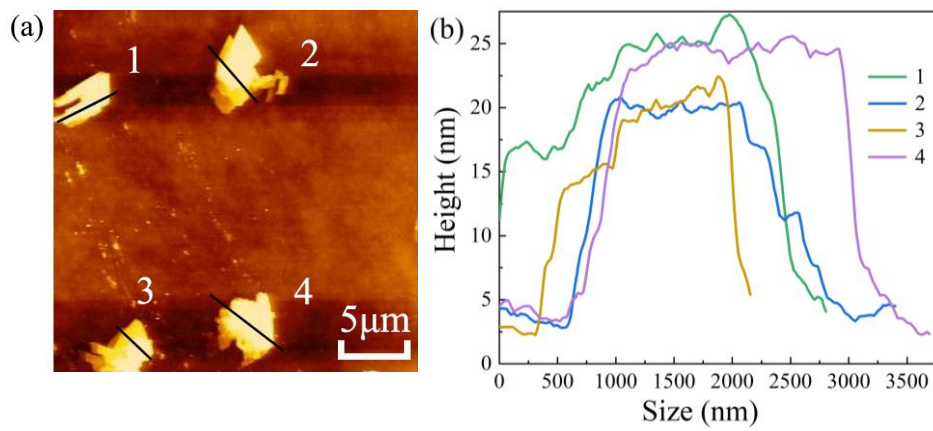

Figure S3. (a) AFM image and (b) height-profile.

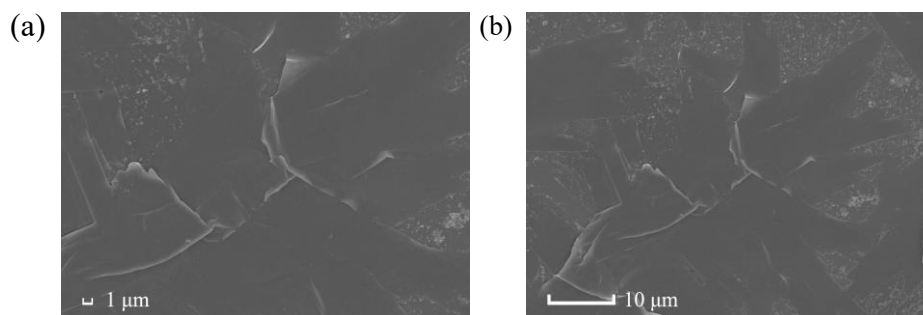

Figure S4. SEM images of Na-Ti<sub>3</sub>C<sub>2</sub>T<sub>x</sub>: after bath sonication for 10 min and centrifugation for 1 h at 3500 rpm, (a) × 3000; (b) × 2000.

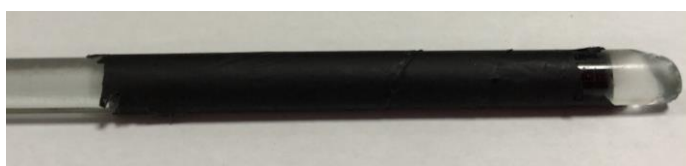

Figure S5. Flexible Ti<sub>3</sub>C<sub>2</sub>T<sub>x</sub> MXene film.

Table S1. Comparison of performances of different MXenes

| MXenes                                                                             | Current Density<br>(A·g <sup>-1</sup> ) | Cycle<br>Number | Specific Capacity<br>(mAh·g <sup>-1</sup> ) | Refs         |
|------------------------------------------------------------------------------------|-----------------------------------------|-----------------|---------------------------------------------|--------------|
| Black phosphorus/Ti <sub>3</sub> C <sub>2</sub><br>(HF)                            | 1                                       | 10              | 67.3                                        | (1)          |
| NaTi <sub>2</sub> (PO <sub>4</sub> ) <sub>3</sub> / Ti <sub>3</sub> C <sub>2</sub> | 1                                       | 10              | 166                                         | (2)          |
| Ti <sub>3</sub> C <sub>2</sub> (HF)                                                | 0.02                                    | 50              | 103                                         | (3)          |
|                                                                                    | 0.5                                     | 10              | 60                                          |              |
| Ti <sub>3</sub> C <sub>2</sub> (HF)                                                | 0.02                                    | 100             | 100                                         | (4)          |
|                                                                                    | 0.5                                     | 10              | 60                                          |              |
| Ti <sub>3</sub> C <sub>2</sub> (HF)                                                | 0.1                                     | 120             | 80                                          | (5)          |
| a-Ti <sub>3</sub> C <sub>2</sub> MNRs (HF)                                         | 0.2                                     | 500             | 53                                          | (6)          |
| Ti <sub>3</sub> C <sub>2</sub> (HCl + LiF)                                         | 0.1                                     | 75              | 87                                          | (7)          |
| Ti <sub>3</sub> C <sub>2</sub> (HCl + LiF)                                         | 1                                       | 100             | 102                                         | (8)          |
| Ti <sub>3</sub> C <sub>2</sub> (HF)                                                | 0.2                                     | 1000            | 68.3                                        | (9)          |
| Ti <sub>3</sub> C <sub>2</sub> (NaHF <sub>2</sub> )                                | 1                                       | 900             | 70                                          | this<br>work |
|                                                                                    | 1                                       | 1000            | 120                                         |              |

## References

1. H. Li, A. Liu, X. Ren, Y. Yang, L. Gao, M. Fan, T. Ma, *Nanoscale* 2019, **11**, 19862.
2. Q. Yang, T. Jiao, M. Li, Y. Li, L. Ma, F. Mo, G. Liang, D. Wang, Z. Wang, Z. Ruan, W. Zhang, Q. Huang, C. Zhi, *J. Mater. Chem. A* 2018, **6**, 18525.
3. J. Zhu, M. Wang, M. Lyu, Y. Jiao, A. Du, A. Luo, B. Luo, I. Gentle, L. Wang, *ACS Appl. Nano Mater.* 2018, **1**, 6854.
4. S. Kajiyama, L. Szabova, K. Sodeyama, H. Iinuma, R. Morita, K. Gotoh, Y. Tateyama, M. Okubo, A. Yamada, *ACS nano* 2016, **10**, 3334.
5. Y. Xie, Y. Dall'Agnese, M. Naguib, Y. Gogotsi, M. W. Barsoum, H. L. Zhuang, P. R. C. Kent, *ACS nano* 2014, **8**, 9606.
6. P. Lian, Y. Dong, Z. S. Wu, S. Zheng, X. Wang, S. Wang, C. Sun, J. Qin, X. Shi, X. Bao, *Nano Energy* 2017, **40**, 1.
7. J. Qin, L. Hao, X. Wang, Y. Jiang, X. Xie, R. Yang, M. Cao, *Chem. Eur. J.* 2020, **26**, 11231.
8. T. Zhang, L. Pan, H. Tang, F. Du, Y. Guo, T. Qiu, J. Yang, *J. Alloys Compd.* 2017, **695**, 818.
9. X. Wang, X. Shen, Y. Gao, Z. Wang, R. Yu, L. Chen, *J. Am. Chem. Soc.* 2015, **137**, 2715.
